# Supplementary material for: Study of volatile selenium metabolites stability in normal urine: effects of sample handling and storage conditions
Source: Royal Society of Chemistry journal article supplement (doi:10.1039/c0ja00117a), 2011-01-01
Supplement: c0ja00117a.pdf [file c0ja00117a.pdf]

Electronic Supplementary Information for

Study of volatile selenium metabolites stability in normal urine: effects of sample handling and storage conditions. Marlène Klein, Hugues Preud'homme, Maité Bueno and Florence Pannier

**HS SPME calibration slopes in urine matrices compared to the ones in Milli-Q water (in %)**

|       | $(\text{slope}_{\text{matrix}} - \text{slope}_{\text{milliQ}}) \times 100 / \text{slope}_{\text{milliQ}}$ |             |
|-------|-----------------------------------------------------------------------------------------------------------|-------------|
|       | Synthetic urine                                                                                           | Human urine |
| DMSe  | - 83%                                                                                                     | - 23%       |
| DMDS  | + 22%                                                                                                     | + 34%       |
| DMDSe | - 24%                                                                                                     | - 96%       |
| DMTS  | + 22%                                                                                                     | + 29%       |

**m/z of monitored parent and daughter ions in MRM analysis mode**

| Compound                    | m/z of parent ion | m/z of daughter ion                                                 |
|-----------------------------|-------------------|---------------------------------------------------------------------|
| DMSe ( <sup>80</sup> Se)    | 109.96            | 94.94 (CH <sub>3</sub> loss)                                        |
| DMSe ( <sup>78</sup> Se)    | 107.96            | 92.94 (CH <sub>3</sub> loss)                                        |
| DMSes ( <sup>80</sup> Se)   | 141.94            | 126.91 (CH <sub>3</sub> loss)<br>46.99 (CH <sub>3</sub> Se loss)    |
| DMSes ( <sup>78</sup> Se)   | 139.94            | 124.91 (CH <sub>3</sub> loss)<br>46.99 (CH <sub>3</sub> Se loss)    |
| DMDSe ( <sup>80</sup> Se)   | 189.88            | 174.86 (CH <sub>3</sub> loss)                                       |
| DMDSe ( <sup>78</sup> Se)   | 187.88            | 172.86 (CH <sub>3</sub> loss)                                       |
| DMSesDS ( <sup>80</sup> Se) | 173.91            | 126.91 (CH <sub>3</sub> S loss)<br>46.99 (CH <sub>3</sub> SeS loss) |
| DMSesDS ( <sup>78</sup> Se) | 171.91            | 124.91 (CH <sub>3</sub> S loss)<br>46.99 (CH <sub>3</sub> SeS loss) |
